# Supplementary material for: Conserved Gene Order and Expanded Inverted Repeats Characterize Plastid Genomes of Thalassiosirales
Source: PLOS journal article supplement (doi:10.1371/journal.pone.0107854), 2014-09-18
Supplement: S2 (10.1371/journal.pone.0107854.s002) [file journal.pone.0107854.s002]

Supplementary figure 2. Inversion events from the *Roundia cardiophora* plastid genome to *Thalassiosira oceanica* plastid genome.

| Step | Description                   |   |    |     |     |     |     |    |    |    |    |     |    |    |    |     |     |     |   |    |   |    |    |     |     |     |     |    |     |     |     |     |    |
|------|-------------------------------|---|----|-----|-----|-----|-----|----|----|----|----|-----|----|----|----|-----|-----|-----|---|----|---|----|----|-----|-----|-----|-----|----|-----|-----|-----|-----|----|
| 0    | <i>Roundia cardiophora</i>    | 1 | 10 | 9   | 14  | 15  | 19  | 20 | 8  | 12 | 11 | 6   | 18 | 17 | 16 | 13  | 5   | 7   | 4 | 3  | 2 | 21 | 29 | 28  | 22  | 23  | 24  | 30 | 31  | 32  | 27  | 26  | 25 |
| 1    | Reversal                      | 1 | 10 | -14 | -9  | 15  | 19  | 20 | 8  | 12 | 11 | 6   | 18 | 17 | 16 | 13  | 5   | 7   | 4 | 3  | 2 | 21 | 29 | 28  | 22  | 23  | 24  | 30 | 31  | 32  | 27  | 26  | 25 |
| 2    | Reversal                      | 1 | 10 | -14 | -9  | 15  | 19  | 20 | 8  | 12 | 11 | -18 | -6 | 17 | 16 | 13  | 5   | 7   | 4 | 3  | 2 | 21 | 29 | 28  | 22  | 23  | 24  | 30 | 31  | 32  | 27  | 26  | 25 |
| 3    | Reversal                      | 1 | 10 | -14 | -9  | 15  | 19  | 20 | 8  | 12 | 11 | -18 | -6 | 17 | 16 | 13  | -7  | -5  | 4 | 3  | 2 | 21 | 29 | 28  | 22  | 23  | 24  | 30 | 31  | 32  | 27  | 26  | 25 |
| 4    | Reversal                      | 1 | 10 | -14 | -20 | -19 | -15 | 9  | 8  | 12 | 11 | -18 | -6 | 17 | 16 | 13  | -7  | -5  | 4 | 3  | 2 | 21 | 29 | 28  | 22  | 23  | 24  | 30 | 31  | 32  | 27  | 26  | 25 |
| 5    | Reversal                      | 1 | 10 | -14 | -20 | -19 | -15 | 9  | 8  | 12 | 11 | -18 | -6 | 17 | 16 | 13  | -7  | -5  | 4 | 3  | 2 | 21 | 29 | -24 | -23 | -22 | -28 | 30 | 31  | 32  | 27  | 26  | 25 |
| 6    | Reversal                      | 1 | 10 | -14 | -20 | -19 | -15 | 9  | 8  | 12 | 11 | -18 | -6 | 17 | 16 | 13  | -7  | -5  | 4 | 3  | 2 | 21 | 29 | -24 | -23 | -22 | -28 | 30 | -26 | -27 | -32 | -31 | 25 |
| 7    | Reversal                      | 1 | 10 | -14 | -20 | -19 | -15 | 9  | 8  | 12 | 11 | -18 | -6 | 17 | 16 | 13  | -7  | -5  | 4 | 3  | 2 | 21 | 29 | -24 | -23 | -22 | -28 | 26 | -30 | -27 | -32 | -31 | 25 |
| 8    | Reversal                      | 1 | 10 | -14 | -20 | -19 | -15 | 9  | 8  | 12 | 11 | -18 | -6 | 17 | 16 | 13  | -7  | -5  | 4 | 3  | 2 | 21 | 29 | -24 | -23 | -22 | -28 | 26 | -30 | -25 | 31  | 32  | 27 |
| 9    | Reversal                      | 1 | 10 | -14 | -20 | -19 | -15 | 9  | 8  | 12 | 11 | -3  | -4 | 5  | 7  | -13 | -16 | -17 | 6 | 18 | 2 | 21 | 29 | -24 | -23 | -22 | -28 | 26 | -30 | -25 | 31  | 32  | 27 |
| 10   | Reversal                      | 1 | 10 | -14 | -20 | -19 | -15 | 9  | 17 | 16 | 13 | -7  | -5 | 4  | 3  | -11 | -12 | -8  | 6 | 18 | 2 | 21 | 29 | -24 | -23 | -22 | -28 | 26 | -30 | -25 | 31  | 32  | 27 |
|      | <i>Thalassiosira oceanica</i> |   |    |     |     |     |     |    |    |    |    |     |    |    |    |     |     |     |   |    |   |    |    |     |     |     |     |    |     |     |     |     |    |

Note: Only one IR is included in this analysis
